# Supplementary material for: Deep eutectic solvents as performance additives in biphasic reactions
Source: Royal Society of Chemistry journal article supplement (doi:10.1039/c7ra06755k), 2017-01-01
Supplement: c7ra06755k1.pdf [file c7ra06755k1.pdf]

## Supporting Information

### **Deep eutectic solvents as performance additives in biphasic reactions**

Dongming Lan<sup>a, §</sup>, XuPing Wang<sup>a, §</sup>, Pengfei Zhou<sup>b</sup>, Frank Hollmann<sup>c</sup> and Yonghua Wang<sup>a,\*</sup>

<sup>a</sup>. School of Food Science and Engineering, South China University of Technology, Guangzhou 510640 (P.R. China)

<sup>b</sup>. School of Bioscience and Bioengineering, South China University of technology, Guangzhou 510006 (P.R. China)

<sup>c</sup>. Department of Biotechnology, Delft University of Technology Van der Maasweg 9,2629HZ, Delft (The Netherlands)

§.These authors make equal contribution to this work.

\*Corresponding author: E-mail: [yonghw@scut.edu.cn](mailto:yonghw@scut.edu.cn)

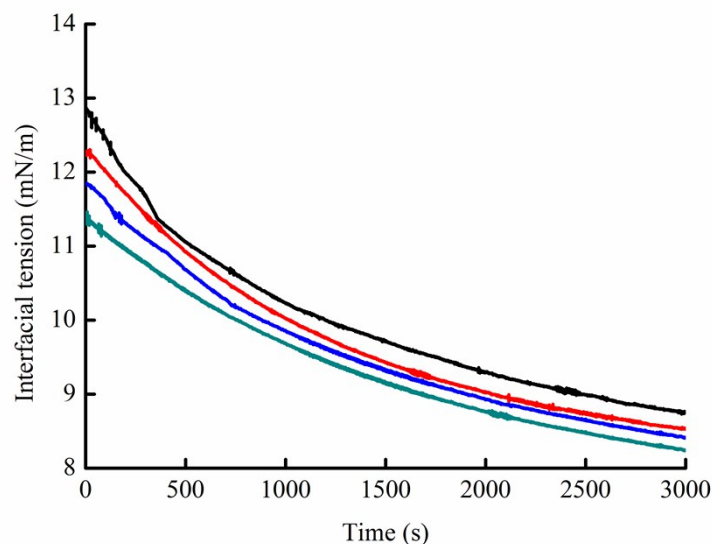

Figure S1 Time course analysis of interfacial tension of soybean oil and water solution containing various content of ChCl/sorbitol DES. 0% (■), 30% (■), 50% (■) and 70% (■).

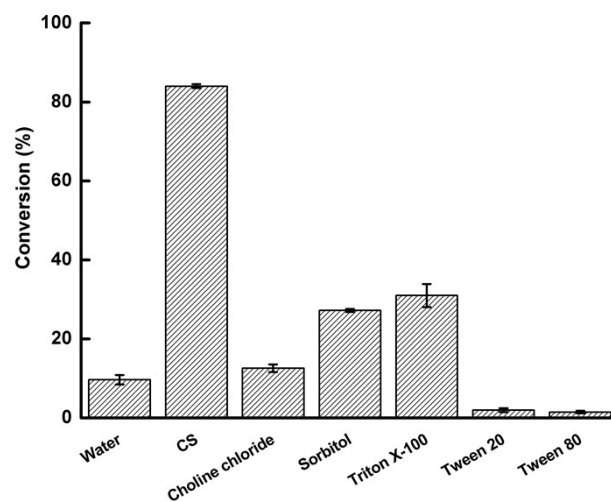

Figure S2 Effect of DES single component and detergents on the catalytic efficiency. Reactions were performed in a 10mL Erlenmeyer flask at 40°C for 12 h with magnetic stirring (500 rpm). The reaction mixture contained SBO (3.0 g), hydrogen peroxide (30%, 1.2 mL), PCL (300 mg) and DES (4.26 g). Single CS DES component of choline or sorbitol was added with the same molar as CS DES. And 0.149g surfactants (5% ) were added into the reaction.
